# Supplementary material for: Recombinant protein-based ELISA for the detection and differentiation of antibodies against fowl adenovirus serotype 4 in infected and vaccinated chickens
Source: Research Square preprint supplement (doi:10.21203/rs.3.rs-7827331/v1), 2025-12-22
Supplement: Supplementary file 1 [file 071ed6c4113d0d788c2a0468.docx]

**Table S1-1 The optimal coating concentration of the 100K recombinant antigen and the optimal serum dilution.**

| Serum dilution |  | Coating concentration of the 100K recombinant antigen (μg/mL) | | | | |
| --- | --- | --- | --- | --- | --- | --- |
|  | 48 | 24 | 12 | 6 | 3 |
| 1:50 | + | 1.511 | 1.485 | 1.421 | 1.331 | 1.021 |
| - | 0.234 | 0.208 | 0.174 | 0.146 | 0.104 |
| P/N | 6.5 | 7.1 | 8.2 | 9.1 | 9.8 |
| 1:100 | + | 1.269 | 1.200 | 1.003 | **0.977** | 0.654 |
| - | 0.128 | 0.118 | 0.094 | **0.077** | 0.061 |
| P/N | 9.9 | 10.2 | 10.7 | **12.7** | 10.7 |
| 1:200 | + | 0.891 | 0.836 | 0.722 | 0.631 | 0.314 |
| - | 0.084 | 0.078 | 0.066 | 0.057 | 0.045 |
| P/N | 10.6 | 10.7 | 10.9 | 11.1 | 7.0 |
| 1:400 | + | 0.539 | 0.518 | 0.459 | 0.377 | 0.201 |
| - | 0.058 | 0.056 | 0.048 | 0.043 | 0.038 |
| P/N | 9.3 | 9.3 | 9.6 | 8.8 | 5.3 |

Table S1-2 The optimal coating concentration of the 22K recombinant antigen and the optimal serum dilution

| Serum dilution |  | Coating concentration of the 22K recombinant antigen (μg/mL) | | | | |
| --- | --- | --- | --- | --- | --- | --- |
|  | 32 | 16 | 8 | 4 | 2 |
| 1:50 | + | 1.453 | 1.395 | 1.077 | 0.697 | 0.385 |
| - | 0.281 | 0.238 | 0.161 | 0.113 | 0.059 |
| P/N | 5.2 | 5.9 | 6.7 | 6.2 | 6.5 |
| 1:100 | + | 1.127 | **0.995** | 0.701 | 0.479 | 0.245 |
| - | 0.173 | **0.135** | 0.110 | 0.078 | 0.041 |
| P/N | 6.5 | **7.4** | 6.4 | 6.1 | 6.0 |
| 1:200 | + | 0.737 | 0.641 | 0.408 | 0.270 | 0.141 |
| - | 0.109 | 0.093 | 0.060 | 0.041 | 0.029 |
| P/N | 6.8 | 6.9 | 6.8 | 6.6 | 4.9 |
| 1:400 | + | 0.426 | 0.358 | 0.237 | 0.156 | 0.081 |
| - | 0.079 | 0.063 | 0.044 | 0.031 | 0.021 |
| P/N | 5.4 | 5.7 | 5.4 | 5.0 | 3.9 |

Table S2 Identification of the coating conditions

| Coating condition | 100K | | | 22K | | |
| --- | --- | --- | --- | --- | --- | --- |
| + | - | P/N | + | - | P/N |
| 37 ℃ 1 h, then 4 ℃ 14 h | 0.770 | 0.180 | 4.3 | 0.723 | 0.180 | 4.0 |
| 37 ℃ 2 h, then 4 ℃ 14 h | **1.020** | **0.190** | **5.4** | **0.830** | **0.196** | **4.2** |
| 37 ℃ 3 h, then 4 ℃ 14 h | 1.070 | 0.230 | 4.7 | 0.850 | 0.230 | 3.7 |
| 25℃ 14h | 1.030 | 0.200 | 5.2 | 0.797 | 0.206 | 3.9 |
| 4℃14h | 0.760 | 0.180 | 4.2 | 0.624 | 0.190 | 3.3 |

Table S3 Determination of the optimal blocking time

| Blocking time | 100K | | |  | 22K | | |
| --- | --- | --- | --- | --- | --- | --- | --- |
| + | - | P/N | + | - | P/N |
| 30 min | 0.890 | 0.180 | 4.9 |  | 0.990 | 0.229 | 4.3 |
| **60 min** | **1.083** | **0.194** | **5.6** |  | **0.993** | **0.216** | **4.6** |
| 90 min | 1.069 | 0.218 | 4.9 |  | 0.955 | 0.221 | 4.3 |
| 120 min | 1.016 | 0.226 | 4.5 |  | 0.854 | 0.213 | 4.0 |

Table S4 Determination of the optimal serum incubation time

| Incubation time | 100K | | |  | 22K | | |
| --- | --- | --- | --- | --- | --- | --- | --- |
| + | - | P/N |  | + | - | P/N |
| **30 min** | **0.964** | **0.152** | **6.3** |  | **0.841** | **0.153** | **5.6** |
| 60 min | 1.082 | 0.201 | 5.4 |  | 1.040 | 0.234 | 4.4 |
| 90 min | 1.134 | 0.228 | 5.0 |  | 1.127 | 0.259 | 4.4 |
| 120 min | 1.197 | 0.260 | 4.6 |  | 1.151 | 0.294 | 3.9 |

Table S5 Determination of the optimal dilution of the HRP-conjugated secondary antibody

| Secondary antibody dilution | 100K | | | 22K | | |
| --- | --- | --- | --- | --- | --- | --- |
| + | - | P/N | + | - | P/N |
| 1:2 500 | 0.986 | 0.226 | 4.4 | 0.990 | 0.270 | 3.7 |
| **1:5 000** | **0.930** | **0.160** | **5.8** | **0.854** | **0.198** | **4.3** |
| 1:7 500 | 0.680 | 0.130 | 5.2 | 0.621 | 0.159 | 3.9 |
| 1:10 000 | 0.550 | 0.118 | 4.7 | 0.387 | 0.126 | 3.1 |
| 1:15 000 | 0.470 | 0.100 | 4.7 | 0.270 | 0.088 | 3.1 |
| 1:20 000 | 0.360 | 0.080 | 4.5 | 0.234 | 0.069 | 3.4 |

Table S6 Determination of the optimal HRP-conjugated secondary antibody incubation time

| Incubation time | 100K | | | 22K | | |
| --- | --- | --- | --- | --- | --- | --- |
| + | - | P/N | + | - | P/N |
| **30 min** | **0.950** | **0.154** | **6.2** | **0.751** | **0.148** | **5.1** |
| 60 min | 1.180 | 0.210 | 5.6 | 0.978 | 0.230 | 4.3 |
| 90 min | 1.234 | 0.233 | 5.3 | 1.055 | 0.270 | 3.9 |
| 120 min | 1.229 | 0.243 | 5.1 | 1.031 | 0.299 | 3.5 |

Table S7 Determination of optimal color development time

| Color development time | 100K | | | 22K | | |
| --- | --- | --- | --- | --- | --- | --- |
| + | - | P/N | + | - | P/N |
| 5 min | 0.370 | 0.090 | 4.1 | 0.299 | 0.093 | 3.2 |
| 7 min | 0.643 | 0.124 | 5.2 | 0.392 | 0.124 | 3.2 |
| 9 min | 0.745 | 0.144 | 5.2 | 0.620 | 0.135 | 4.6 |
| **11 min** | **0.973** | **0.165** | **5.9** | **0.870** | **0.164** | **5.3** |
| 13 min | 0.996 | 0.21 | 4.7 | 0.993 | 0.223 | 4.5 |
| 15 min | 1.157 | 0.253 | 4.6 | 1.051 | 0.234 | 4.5 |
